# Supplementary material
Source: Research Square preprint supplement (doi:10.21203/rs.3.rs-10020701/v1)
Supplement: Supplementary file 1 [file 523c1d845c31dca588618254.xlsx]

## Sheet: egger_results_summary
file	n_studies	intercept	se_intercept	t_stat	df	p_value
Overall treatment efficacy.csv	36	-2.43768	0.286131	-8.51944	34	5.96405e-10
sputum conversion.csv	58	-1.97971	0.144392	-13.7106	56	0
lesion absorption.csv	49	-2.87928	0.181005	-15.9072	47	0
cavity absorption.csv	33	-3.34556	0.140257	-23.8531	31	0
