# Supplementary material
Source: Research Square preprint supplement (doi:10.21203/rs.3.rs-10020701/v1)
Supplement: Supplementary file 1 [file a01b9fc61ee81725c07e6b2e.pdf]

Author(s): Xiao-Xiao Li

Question: Well-controlled vs Poorly-controlled Blood Glucose on Treatment Effect/Sputum Conversion/Pulmonary Lesion Absorption/Cavity Closure/Recurrence

Setting: Anti-tuberculosis treatment in patients with comorbid diabetes and pulmonary tuberculosis

Bibliography: Optimal glycemic control versus Suboptimal glycemic control for therapeutic outcomes of tuberculosis in patients with comorbid diabetes mellitus. Cochrane Database of Systematic Reviews 2026, in press.

| Certainty assessment               |                        |                      |               |              |             |                                                                                                                                                            | No of patients                |                                 | Effect                 |                                                   | Certainty                     | Importance |
|------------------------------------|------------------------|----------------------|---------------|--------------|-------------|------------------------------------------------------------------------------------------------------------------------------------------------------------|-------------------------------|---------------------------------|------------------------|---------------------------------------------------|-------------------------------|------------|
| No of studies                      | Study design           | Risk of bias         | Inconsistency | Indirectness | Imprecision | Other considerations                                                                                                                                       | Well-controlled Blood Glucose | Poorly-controlled Blood Glucose | Relative (95% CI)      | Absolute (95% CI)                                 |                               |            |
| <b>treatment effect</b>            |                        |                      |               |              |             |                                                                                                                                                            |                               |                                 |                        |                                                   |                               |            |
| 46                                 | non-randomised studies | serious <sup>a</sup> | not serious   | not serious  | not serious | publication bias strongly suspected very strong association all plausible residual confounding would reduce the demonstrated effect dose response gradient | 1663/2342 (71.0%)             | 2192/2389 (91.8%)               | OR 0.15 (0.13 to 0.19) | 292 fewer per 1,000 (from 326 fewer to 239 fewer) | ⊕⊕⊕⊕<br>High <sup>a</sup>     | CRITICAL   |
| <b>sputum conversion</b>           |                        |                      |               |              |             |                                                                                                                                                            |                               |                                 |                        |                                                   |                               |            |
| 68                                 | non-randomised studies | serious <sup>a</sup> | not serious   | not serious  | not serious | publication bias strongly suspected strong association all plausible residual confounding would reduce the demonstrated effect dose response gradient      | 1924/3266 (58.9%)             | 2729/3184 (85.7%)               | OR 0.20 (0.17 to 0.22) | 312 fewer per 1,000 (from 352 fewer to 288 fewer) | ⊕⊕⊕⊙<br>Moderate <sup>a</sup> | CRITICAL   |
| <b>pulmonary lesion absorption</b> |                        |                      |               |              |             |                                                                                                                                                            |                               |                                 |                        |                                                   |                               |            |
| 53                                 | non-randomised studies | serious <sup>a</sup> | not serious   | not serious  | not serious | publication bias strongly suspected strong association all plausible residual confounding would reduce the demonstrated effect dose response gradient      | 1389/2256 (61.6%)             | 2386/2752 (86.7%)               | OR 0.20 (0.17 to 0.23) | 301 fewer per 1,000 (from 341 fewer to 267 fewer) | ⊕⊕⊕⊙<br>Moderate <sup>a</sup> | CRITICAL   |
| <b>cavity closure</b>              |                        |                      |               |              |             |                                                                                                                                                            |                               |                                 |                        |                                                   |                               |            |
| 37                                 | non-randomised studies | serious <sup>a</sup> | not serious   | not serious  | not serious | publication bias strongly suspected strong association all plausible residual confounding would reduce the demonstrated effect dose response gradient      | 604/1235 (48.9%)              | 948/1264 (75.0%)                | OR 0.26 (0.22 to 0.32) | 312 fewer per 1,000 (from 352 fewer to 260 fewer) | ⊕⊕⊕⊙<br>Moderate <sup>a</sup> | CRITICAL   |
| <b>recurrence rate</b>             |                        |                      |               |              |             |                                                                                                                                                            |                               |                                 |                        |                                                   |                               |            |
| 7                                  | non-randomised studies | serious <sup>b</sup> | not serious   | not serious  | not serious | strong association all plausible residual confounding would reduce the demonstrated effect                                                                 | 122/434 (28.1%)               | 35/420 (8.3%)                   | OR 4.57 (3.01 to 6.92) | 210 more per 1,000 (from 132 more to 303 more)    | ⊕⊕⊕⊙<br>Moderate <sup>b</sup> | CRITICAL   |

CI: confidence interval; OR: odds ratio

**Explanations**

a. The overall risk of bias is serious. First, most included retrospective studies failed to adequately adjust for confounding by anti-tuberculosis treatment regimens, baseline glycemic control duration and imbalanced baseline characteristics. Second, inconsistent follow-up durations across studies further complicate the interpretation of treatment effects. The average NOS score of included studies was 5, indicating moderate methodological quality. Egger's test indicated significant publication bias (P<0.05), and the funnel plot showed obvious asymmetry.

b. Serious risk of bias for the relapse outcome is attributed to three main factors: first, the limited number of included studies and small sample size that amplifies random errors; second, methodological heterogeneity across studies including inconsistent baseline characteristics and follow-up durations; and third, residual confounding from non-uniform anti-tuberculosis treatment regimens in retrospective designs. Additionally, publication bias was not assessed for this outcome due to the small number of included studies, and heterogeneity testing was limited by the same constraint.
