# Supplementary material
Source: Research Square preprint supplement (doi:10.21203/rs.3.rs-10020701/v1)
Supplement: Supplementary file 2 [file ba41fcecbc00b12420960d2e.xlsx]

## Sheet: NOS评分
	Selection				comparability	Outcome			Total，n
	S1	S2	S3	S4	C	O1	O2	O3
Cai 2014			√		0		√		5
Cao 2012		√			0		√		4
Cao 2013				√	0		√		6
Chai 2018				√	0		√		6
Chen 2011				√	0			√	7
Chen 2013		√			0		√		4
Chen 2015				√	0			√	7
Chen 2017		√			0			√	5
Chen 2019		√			0			√	5
Chen 2020			√		0			√	6
Chen 2021			√		0			√	6
Chen 2022			√		0			√	6
Cheng 2016			√		0			√	6
Cheng 2024			√		0			√	6
Chen YF 2020		√			0			√	5
Chen YH 2011			√		0			√	6
Deng 2012			√		0		√		5
Deng 2018			√		0			√	6
Dong 2012			√		0		√		5
Fan 2014			√		0		√		5
Fu 2017				√	0			√	7
Gao 2021			√		0		√		5
Ge 2014		√			0		√		4
Guo 2015		√			0		√		4
Han 2014			√		0		√		5
Hang 2013			√		0			√	6
Hassan 2018				√	0		√		6
Hu 2015		√			0		√		4
Huang 2018			√		0			√	6
Jiang 2021			√		0			√	6
Ke 2015			√		0		√		5
Li 2010			√		0			√	6
Li 2011			√		0			√	6
Li 2012		√			0		√		4
Li 2013			√		0			√	6
Li 2015			√		0			√	6
Li 2019			√		0		√		5
Liu 2011				√	0			√	7
Lu 2015				√	0			√	7
Lu 2016			√		0			√	7
Lv 2020			√		0			√	6
Mo 2010			√		0		√		5
Ning 2015			√		0			√	6
Pan 2017		√			0		√		4
Qin 2024				√	0			√	7
Shao 2016			√		0		√		5
Shen 2016		√			0			√	5
Shi 2024			√		0		√		5
Song 2016		√			0			√	5
Song 2020			√		0		√		5
Tang 2016		√			0			√	5
Tian 2025				√	0		√		6
Vinay 2017				√	0			√	7
Wang 2010		√			0		√		4
Wang 2011			√		0		√		6
Wang 2013			√		0			√	6
Wang 2014			√		0			√	6
Wang 2015				√	0			√	7
Wang 2016				√	0			√	7
Wang 2022			√		0			√	6
Wang 2024			√		0			√	6
Wang 2025				√	0			√	7
Wang K 2015				√	0			√	7
Wang M 2010		√			0		√		4
Wang W2025			√		0		√		5
Wen 2015			√		0			√	6
Wu 2011			√		0			√	6
Wu 2019			√		0		√		5
Wu 2021		√			0			√	5
Xi 2014		√			0		√		4
Xi 2017			√		0		√		5
Xiang 2015			√		0		√		5
Xie 2015		√			0			√	5
Xin 2018				√	0			√	7
Xu 2025			√		0		√		5
Yan 2019			√		0		√		5
Yang 2015			√		0			√	6
Yang 2018			√		0			√	6
Yang 2019			√		0			√	6
Yang 2020				√	0		√		6
Yang N 2018				√	0			√	7
Yang SJ 2018			√		0			√	6
Yao 2024			√		0		√		5
Yu 2025			√		0			√	6
Zeng 2019			√		0			√	6
Zhang 2016			√		0			√	6
Zhang 2018				√	0			√	7
Zhang 2022			√		0		√		5
Zhang 2023		√			0			√	5
Zhao 2013			√		0		√		5
Zheng 2016				√	0			√	7
Zhou 2013			√		0		√		5
Zhou 2017		√			0		√		4
Zhou 2025			√		0			√	6
Zhu 2020			√		0			√	6
Zhu 2025			√		0		√		5
Zou 2021			√		0			√	6
