# Supplementary material
Source: Research Square preprint supplement (doi:10.21203/rs.3.rs-10020701/v1)
Supplement: Supplementary file 2 [file eba717bab2980e1a50e2d929.docx]

**Supplementary File： Search Strategy**

Databases: Chinese databases (CNKI, Wanfang Data, VIP ,SinoMed Database); English databases (PubMed, Embase, Cochrane Library, Web of Science)

1.PubMed:

#1 (tuberculosis[Title/Abstract]) OR (tb[Title/Abstract])

#2 ((glycemic control[Title/Abstract]) OR (blood glucose control[Title/Abstract])) OR (blood sugar control[Title/Abstract])

#3 #1 AND #2

2. EMBASE: ('glycemic control':ti,ab,kw OR 'blood glucose control':ti,ab,kw OR 'blood sugar control':ti,ab,kw) AND (tuberculosis:ti OR tb:ti)

3.Cochrane Library:( (glycemic control):ti,ab,kw OR (blood glucose control):ti,ab,kw) AND (tuberculosis):ti (Word variations have been searched)"

4. Web of Science：tuberculosis (Title) and blood glucose control OR glycemic control (Abstract) not review (Topic)

5. Wangfang: Title: (blood glucose control) AND Topic: (pulmonary tuberculosis) NOT Topic: (nursing)

6. VIP: ((Title/Keyword = pulmonary tuberculosis AND Title/Keyword = blood glucose control) AND (NOT Title/Keyword = nursing))

7. CNKI: ((TI = tuberculosis OR Mycobacterium tuberculosis OR tuberculosis patients OR tubercle bacillus OR pulmonary tuberculosis) AND (SU = blood glucose control)) NOT (SU = nursing)

8. SinoMed: "tuberculosis"[Title: Intelligent Retrieval] AND "blood glucose control"[Title: Intelligent Retrieval] NOT "nursing"[Title: Intelligent Retrieval]
