# Supplementary material
Source: Research Square preprint supplement (doi:10.21203/rs.3.rs-10020701/v1)
Supplement: Supplementary file 3 [file c21af058035b9b7ed055b85c.xlsx]

## Sheet: Sheet2
Author,Year	Country	Study design	Grouping criteria	Glycemic control thresholds (FBG, mmol/l)	Glycemic control thresholds (HbA1c, %)	Treatment and follow-up duration	Baseline characteristics
Cai 2014	China	Retrospective cohort study	Well-controlled Blood Glucose group：FBG＜7.2mmol/L;Poorly-controlled Blood Glucose: FBG≥8.3mmol/L.Subjects with blood glucose levels between the two groups were defined as the moderate glycemic control group	7.2			45 males and 35 females,male/female ratio = 9:7,mean age (50.1±6.2) years.
Cao 2012	China	Retrospective cohort study	Well-controlled Blood Glucose group：FBG＜6.7mmol/L;Poorly-controlled Blood Glucose: FBG＞9.0mmol/L.Subjects with blood glucose levels between the two groups were defined as the moderate glycemic control group	6.7			50 males and 30 females, male/female ratio = 5:3, mean age (56) years.
Cao 2013	China	Retrospective cohort study	Well-controlled Blood Glucose group：FBG＜9.0mmol/L;Poorly-controlled Blood Glucose: FBG＞9.0mmol/L.Total effective rate by blood glucose control (no specific criteria)	9		10month	Well-controlled blood glucose group: 28 patients (15 males, 13 females, ratio = 15:13), mean age 55.2±1.3 years.Poorly controlled group: 32 patients (17 males, 15 females, ratio = 17:15), mean age 56.1±1.5 years.
Chai 2018	China	Retrospective cohort study	Well-controlled Blood Glucose group：FBG≤9.0 mmol/L;Poorly-controlled Blood Glucose: FBG＞9.0mmol/L	9、7			Well-controlled group: 42 cases (24 males, 18 females, ratio = 4:3), mean age 49.84±8.62 years.Poorly controlled group: 54 cases (30 males, 24 females, ratio = 5:4), mean age 50.12±8.03 years.Lesion absorption was stratified by blood glucose ≤7.1 mmol/L into well and poorly controlled groups.
Chen 2011	China	Retrospective cohort study	Well-controlled Blood Glucose group：FBG＜7.0mmol/L;Poorly-controlled Blood Glucose: FBG≥7.0mmol/L.	7		12month	Well-controlled group: 43 cases (24 males, 19 females);poorly-controlled group: 41 cases (24 males, 17 females).
Chen 2013	China	Retrospective cohort study	Well-controlled Blood Glucose group：FBG＜8.1mmol/L;Poorly-controlled Blood Glucose: FBG＞11.1mmol/L.Subjects with blood glucose levels between the two groups were defined as the moderate glycemic control group	8			Males accounted for 88 cases (60.69%) and females 57 cases (39.31%), with a mean age of 51 years.
Chen 2015	China	Prospective Cohort Study	The control group received no standardized glycemic control intervention, while the intervention group was treated with oral hypoglycemic agents or insulin for blood glucose management,FBG≤8.3mmol/L.			6month	Observation group (n=80): 50 males and 30 females, mean age 55.4±1.2 years.Control group (n=80): 42 males and 38 females, mean age 56.2±1.1 years.
Chen 2017	China	Retrospective cohort study	Divided into well-controlled, moderately controlled and poorly controlled glycemic groups; specific grouping criteria were unspecified.			Overall treatment efficacy 9month，sputum conversion 3month	A total of 89 patients, including 30 with well-controlled blood glucose, 30 with fairly controlled blood glucose and 29 with poorly controlled blood glucose; mean age 47.30±11.20 years.
Chen 2019	China	Prospective Cohort Study	In the observation group, patients were stratified by glycemic indicators.Poorly-controlled Blood Glucose: FBG＞7.0 mmol/L and HbA1c＞8.0%;Well-controlled Blood Glucose group：FBG＜6.1 mmol/L and HbA1c＜8.0%;Those with intermediate values were categorized as the moderate glycemic control group.;	6.1		6month	47 males and 42 females; mean age 55.7±4.2 years.
Chen 2020	China	Prospective Cohort Study	The intervention group was divided into well-controlled and poorly-controlled glycemic subgroups; specific grouping criteria unspecified.			2month	Observation group: 28 males and 22 females, mean age 48.3±4.4 years, subdivided into well-controlled and poorly controlled glycemic subgroups.
Chen 2021	China	Prospective Cohort Study	Control group: oral hypoglycemic agents; Intervention group: subcutaneous insulin injection	6		12month	Control group: 16 males and 8 females, mean age 45.65±5.84 years.Observation group: 17 males and 7 females, mean age 47.15±6.61 years.
Chen 2022	China	Retrospective cohort study	Well-controlled Blood Glucose group：HbA1c≤ 7.0% ;Poorly-controlled Blood Glucose: HbA1c ＞7%		7	3month,6month	A total of 100 patients, including 73 males and 27 females.
Cheng 2016	China	Prospective Cohort Study	The control group did not receive blood glucose control.Intervention group:oral hypoglycemic agents			9month	Control group (n=90): 52 males and 38 females, mean age 60±2.7 years.Intervention group (n=90): 47 males and 43 females, mean age 62±3.5 years.
Cheng 2024	China	Prospective Cohort Study	Control group: oral hypoglycemic agents,FBG4.5-7.8 mmol/L; 2h PBG＜11mmol/L; Intervention group: intensive blood glucose control (subcutaneous insulin injection),FBG4.5-7.8 mmol/L; 2h PBG＜10mmol/L			12month	Intervention group: 24 males and 16 females, mean age 51.25±3.11 years.Control group: 22 males and 18 females, mean age 51.88±3.38 years.
Chen YF 2020	China	Prospective Cohort Study	Well-controlled Blood Glucose group：FBG≥7.0 mmol/L;Poorly-controlled Blood Glucose:FBG＜7.0 mmol/L.	7		3month,12month	A total of 54 patients, 32 males and 22 females; mean age 47.18±8.06 years.
Chen YH 2011	China	Retrospective cohort study	Well-controlled Blood Glucose group：FBG＜6.1mmol/L;Poorly-controlled Blood Glucose: FBG＞7mmol/L.Subjects with blood glucose levels between the two groups were defined as the moderate glycemic control group	6.1		9month	A total of 108 patients.
Deng 2012	China	Retrospective cohort study	Well-controlled Blood Glucose group：FBG＜8mmol/L;Poorly-controlled Blood Glucose: FBG＞11.1mmol/L.Subjects with blood glucose levels between the two groups were defined as the moderate glycemic control group	8			A total of 151 patients (107 males, 44 females), mean age 56.1±8.5 years.
Deng 2018	China	Prospective Cohort Study	Control group: oral hypoglycemic agents; Intervention group:received additional subcutaneous insulin injection,FBG≤6.9			2month	Control group: 22 males and 18 females, mean age 65.0±2.2 years.Observation group: 23 males and 17 females, mean age 65.5±2.4 years.
Dong 2012	China	Retrospective cohort study	Well-controlled Blood Glucose group：FBG＜7mmol/L;Poorly-controlled Blood Glucose: FBG＞10mmol/L.Subjects with blood glucose levels between the two groups were defined as the moderate glycemic control group	7			A total of 60 patients: 33 males, 27 females; mean age 54.1±6.5 years.
Fan 2014	China	Prospective Cohort Study	The control group received no glycemic control, while the Intervention group underwent glycemic control with medications and insulin.				Intervention group: 45 males and 29 females, mean age 54.5±5.4 years; Control group: 35 males and 39 females, mean age 55.2±5.8 years.
Fu 2017	China	Prospective Cohort Study	Control group: oral hypoglycemic agents; Intervention group: subcutaneous insulin injection			6month	Control group: 21 males and 19 females, mean age 70.2±3.8 years; Observation group: 22 males and 18 females, mean age 69.1±4.0 years.
Gao 2021	China	Prospective Cohort Study	Control group: oral hypoglycemic agents; Intervention group:received additional subcutaneous insulin injection			2month	The control group (47 patients: 25 males, 22 females) had a minimum age of 31 years and a mean age of 50.12±11.34 years. The intensive group included 47 patients (26 males, 21 females), with a mean age of 50.22±11.21 years.
Ge 2014	China	Retrospective cohort study	Well-controlled Blood Glucose group：FBG＜7.8mmol/L;Poorly-controlled Blood Glucose: FBG＞8.4mmol/L.	7.8			A total of 50 patients, including 35 males and 15 females, with a mean age of 57 years.
Guo 2015	China	Retrospective cohort study	Well-controlled Blood Glucose group：FBG＜7.2mmol/L;Poorly-controlled Blood Glucose: FBG≥8.3mmol/L.Subjects with blood glucose levels between the two groups were defined as the moderate glycemic control group	7.2			A total of 60 cases: 36 males and 24 females, mean age 52.8±3.1 years.
Han 2014	China	Prospective Cohort Study	The control group adjusted the doses of hypoglycemic drugs or insulin based on fasting blood glucose, while the observation group adjusted their antidiabetic regimen according to blood glucose measured by the 7-point method.				Observation group: 40 cases (29 males, 11 females), mean age 59.6±6.2 years; Control group: 40 cases (26 males, 14 females), mean age 57.8±5.9 years.
Hang 2013	China	Retrospective cohort study	Well-controlled Blood Glucose group：FBG＜8.4mmol/L;Poorly-controlled Blood Glucose: FBG＞11.1mmol/L.Subjects with blood glucose levels between the two groups were defined as the moderate glycemic control group	8.4		6month	A total of 128 patients, including 70 males and 58 females, with a mean age of 50.8±12.6 years.
Hassan 2018	Pakistan	Prospective Cohort Study	Well-controlled Blood Glucose group：HbA1c＜ 7.0% ;Poorly-controlled Blood Glucose: HbA1c＞7%		7
Hu 2015	China	Retrospective cohort study	Well-controlled Blood Glucose group：FBG＜6.1mmol/L;Poorly-controlled Blood Glucose: FBG＞11.1mmol/L.Subjects with blood glucose levels between the two groups were defined as the moderate glycemic control group	6.1			A total of 87 patients, including 51 males and 36 females, with a mean age of 59.4±6.8 years.
Huang 2018	China	Prospective Cohort Study	The control group received no standardized glycemic control intervention, while the intervention group was treated with oral hypoglycemic agents or insulin for blood glucose management.			6month	Control group: 11 males and 12 females, mean age 56.8±1.2 years. Intervention group: 13 males and 10 females, mean age 56.5±1.4 years.
Jiang 2021	China	Prospective Cohort Study	Well-controlled Blood Glucose group:FBG≤6.0 mmol/L. Poorly-controlled Blood Glucose:FBG＞6.0 mmol/L.	6			Observation group: male-to-female ratio = 1:1, mean age 61.22±8.93 years.Control group: male-to-female ratio = 9:8, mean age 63.00±8.67 years (range, 45–89 years).
Ke 2015	China	Retrospective cohort study	Well-controlled Blood Glucose group：FBG≤6.1mmol/L;Poorly-controlled Blood Glucose: FBG＞7.0mmol/L.Subjects with blood glucose levels between the two groups were defined as the moderate glycemic control group	6.1			A total of 74 patients were enrolled, including 52 males and 22 females, with a mean age of 52.4±10.4 years.
Li 2010	China	Retrospective cohort study	Well-controlled Blood Glucose group：FBG≤7.0mmol/L;Poorly-controlled Blood Glucose: FBG＞7.0mmol/L.	7		3month,12month	A total of 93 cases, including 54 males and 39 females, with a mean age of 50.3±7.1 years.
Li 2011	China	Prospective Cohort Study	Well-controlled Blood Glucose group：FBG＜6.1mmol/L;Poorly-controlled Blood Glucose: FBG≥6.1mmol/L	6.1		3month	A total of 83 patients (52 males, 31 females), mean age 59 years.
Li 2012	China	Retrospective cohort study	Well-controlled Blood Glucose group：FBG＜7mmol/L;Poorly-controlled Blood Glucose: FBG＞10mmol/L.Subjects with blood glucose levels between the two groups were defined as the moderate glycemic control group	7			A total of 102 patients, including 66 males and 36 females, with a mean age of 48.5±25.5 years.
Li 2013	China	Prospective Cohort Study	Well-controlled Blood Glucose group：FBG＜7.0mmol/L;Poorly-controlled Blood Glucose: FBG≥7.0mmol/L.	7		12month	A total of 65 cases: 42 males and 23 females, mean age 52.1±5.3 years.
Li 2015	China	Retrospective cohort study	Well-controlled Blood Glucose group：FBG≤7.2mmol/L;Poorly-controlled Blood Glucose: FBG＞7.2mmol/L.	7.2		6month,2month	A total of 136 patients: 71 males and 65 females, with a mean age of 53.6 years.
Li 2019	China	Prospective Cohort Study	Control group: oral hypoglycemic agents; Intervention group: intensive blood glucose control (subcutaneous insulin injection).				Control group (n=80): 42 males and 38 females, mean age 63.12±3.42 years.Observation group (n=80): 45 males and 35 females, mean age 63.28±3.52 years.
Liu 2011	China	Prospective Cohort Study	Control group: oral hypoglycemic agents; Intervention group: intensive blood glucose control (subcutaneous insulin injection).			6,12month	Control group: 40 patients, mean age 56.8±8.4 years.Intervention group: 36 patients, mean age 60.0±7.9 years.
Lu 2015	China	Prospective Cohort Study	The control group received conventional treatment, and the observation group received targeted treatment; the specific hypoglycemic methods were not mentioned.			6month	Control group (n=50): 26 males and 24 females, mean age 67.17±6.92 years.Observation group (n=50): 28 males and 22 females, mean age 65.94±4.21 years.
Lu 2016	China	Prospective Cohort Study	Control group: oral hypoglycemic agents; Intervention group: subcutaneous insulin injection			6month	Intervention group: 24 males and 16 females, mean age 40.0±11.7 years.Control group: 25 males and 17 females, mean age 43.0±9.7 years.
Lv 2020	China	Prospective Cohort Study	Control group: oral hypoglycemic agents; Intervention group: subcutaneous insulin injection			18month	Intervention group (n=32): 18 males and 14 females, aged 38–67 years, mean age 50.4±2.5 years.Control group (n=32): 19 males and 13 females, mean age 51.2±2.3 years.
Mo 2010	China	Retrospective cohort study	Well-controlled Blood Glucose group:FBG≤7.8mmol/L,HbA1c ≤6.5%;Poorly-controlled Blood Glucose: FBG＞7.8mmol/L.	7.8	6.5		A total of 45 patients, including 27 males and 18 females, with a mean age of 47 years.
Ning 2015	China	Retrospective cohort study	Well-controlled Blood Glucose group：FBG＜7.2mmol/L;Poorly-controlled Blood Glucose: FBG≥8.3mmol/L.Subjects with blood glucose levels between the two groups were defined as the moderate glycemic control group	7.2		12month	A total of 88 patients: 50 males and 38 females, mean age 53.86±7.28 years.
Pan 2017	China	Retrospective cohort study	Well-controlled Blood Glucose group：FBG＜7.0mmol/L;Poorly-controlled Blood Glucose: FBG≥8.9mmol/L.Subjects with blood glucose levels between the two groups were defined as the moderate glycemic control group	7		12month	A total of 60 patients, 29 males and 31 females, mean age \(53.7\pm4.1\) years.
Qin 2024	China	Retrospective cohort study	HbA1c≤ 7.0% indicates good blood glucose control; 7% < HbA1c < 8% indicates moderate blood glucose control; HbA1c ≥ 8% indicates poor blood glucose control.		7		the good glycemic control group (n=18, 12 males/6 females, age 53.6±6.3 years), fair group (n=22, 14 males/8 females, age 54.1±5.6 years), and poor group (n=20, 14 males/6 females, age 54.2±6.0 years).
Shao 2016	China	Retrospective cohort study	FBG< 6.1mmol/L indicates good blood glucose control; FBG＞ 7.8 mmol/L indicates poor blood glucose control.Subjects with blood glucose levels between the two groups were defined as the moderate glycemic control group	6.1			A total of 60 patients were enrolled, including 41 males and 19 females, with a mean age of 64.7±3.2 years.
Shen 2016	China	Retrospective cohort study	Well-controlled Blood Glucose group：FBG＜7.0mmol/L;Poorly-controlled Blood Glucose: FBG＞10mmol/L.Subjects with blood glucose levels between the two groups were defined as the moderate glycemic control group	7		3month	A total of 54 patients were enrolled, including 33 males and 21 females, with a mean age of 57.1±7.3 years.
Shi 2024	China	Prospective Cohort Study	Control group: oral hypoglycemic agents; Intervention group: subcutaneous insulin injection,FBG≤7mmol/L				Control group (n=54): 30 males, 24 females; mean age: 49.65±10.23 years.Intervention group (n=54): 31 males, 23 females; mean age: 50.23±11.10 years
Song 2016	China	Retrospective cohort study	Well-controlled Blood Glucose group：FBG≤8.2mmol/L;Poorly-controlled Blood Glucose: FBG＞8.2mmol/L	8.2		sputum conversion 3month，Overall treatment efficacy 9month	A total of 76 patients were enrolled, including 42 males and 34 females, with a mean age of 47.39±6.75 years.
Song 2020	China	Prospective Cohort Study	Well-controlled Blood Glucose group: FBG ＜ 6.1 mmol/L;Poorly-controlled Blood Glucose group: FBG ＞ 11.1 mmol/L.Subjects with blood glucose levels between the two groups were defined as the moderate glycemic control group	6.1			A total of 95 patients were enrolled, including 56 males and 39 females, with a mean age of 55.3±8.7 years.
Tang 2016	China	Retrospective cohort study	Poorly-controlled Blood Glucose:FBG≥7.0 mmol/L, HbA1c ＞8%.Well-controlled Blood Glucose group：FBG≤6.1 mmol/L, HbA1c ＜6.5% .Subjects with blood glucose levels between the two groups were defined as the moderate glycemic control group	6.1		3month	A total of 52 cases
Tian 2025	China	Prospective Cohort Study	Control group: oral hypoglycemic agents; Intervention group: subcutaneous insulin injection				Intervention group: 18 males and 12 females (ratio = 3:2), mean age 42.68±9.34 years.Control group: 19 males and 11 females (ratio = 19:11), mean age 44.27±8.96 years.
Vinay 2017	India	Prospective Cohort Study	Poorly-controlled Blood Glucose:HbA1c＞7%.Well-controlled Blood Glucose group:HbA1c＜7% .		7	sputum conversion 2month，Overall treatment efficacy 2years	Poorly controlled group: 423 cases (288 males, 135 females, ratio = 32:15), mean age 48.26±2.35 years.Well-controlled group: 207 cases (135 males, 72 females, ratio = 15:8), mean age 48.91±7.97 years.
Wang 2010	China	Retrospective cohort study	Well-controlled Blood Glucose group：FBG≤7.1mmol/L;Poorly-controlled Blood Glucose: FBG＞7.1mmol/L.	7.1			Total: 54 cases (32 males, 22 females, ratio = 16:11), mean age 51.1 years.
Wang 2011	China	Retrospective cohort study	Well-controlled Blood Glucose group：FBG＜6.1mmol/L,HbA1c＜6.5%;Poorly-controlled Blood Glucose: FBG≥7.0mmol/L,HbA1c＞8%.Subjects with blood glucose levels between the two groups were defined as the moderate glycemic control group	6.1	6.5	3month	Total: 84 cases (58 males, 26 females, ratio = 29:13), mean age 53.5 years.
Wang 2013	China	Retrospective cohort study	Well-controlled Blood Glucose group：FBG＜7.8mmol/L;Poorly-controlled Blood Glucose: FBG≥7.8mmol/L.	7.8		3month	Well-controlled group: 49 cases (36 males, 13 females, ratio = 36:13), mean age 70.8 years.Poorly controlled group: 7 cases (5 males, 2 females, ratio = 5:2), mean age 76.4 years.
Wang 2014	China	Prospective Cohort Study	Intervention group: indicates Well-controlled Blood Glucose group：FBG＜7.0mmol/L;Poorly-controlled Blood Glucose: FBG≥7.0mmol/L.	7		12month,3month	Total: 52 cases (37 males, 15 females, ratio = 37:1), mean age 48.6±5.4 years.
Wang 2015	China	Prospective Cohort Study	Both groups used blood glucose meters. The intervention group adopted seven-point monitoring, with FBG ＜7.0 mmol/L. The control group only detected morning fasting glucose without strict glycemic control.	7		12month,3month	Intervention group: 27 males, 23 females, ratio = 27:23, mean age 49.6±5.3 years.Control group: 24 males, 26 females, ratio = 12:13, mean age 51.2±4.9 years.
Wang 2016	China	Prospective Cohort Study	Control group: oral hypoglycemic agents maintained FBG＜9.0mmol/L; Intervention group: subcutaneous insulin injection maintained FBG＜7mmol/L.			2month	Intervention group: 44 males, 12 females, ratio = 11:3, mean age 52.4±11.6 years. Control group: 43 males, 7 females, ratio = 43:7, mean age 54.2±13.3 years.
Wang 2022	China	Retrospective cohort study	Control group: oral hypoglycemic agents,FBG4.5-7.8 mmol/L; Intervention group: intensive blood glucose control (subcutaneous insulin injection),FBG4.5-7.8 mmol/L;	7.8		1month	Well-controlled group: 40 cases (23 males, 17 females, ratio = 23:17), mean age 53.63±9.1 years.Poorly controlled group: 40 cases (22 males, 18 females, ratio = 11:9), mean age 54.12±9.3 years.
Wang 2024	China	Prospective Cohort Study	Control group: oral hypoglycemic agents; Intervention group: intensive blood glucose control (subcutaneous insulin injection)			1month	Control group: 34 cases (19 males, 15 females, ratio = 19:15), mean age 64.54±4.15 years.Study group: 34 cases (17 males, 17 females, ratio = 1:1), mean age 64.51±4.18 years.
Wang 2025	China	Retrospective cohort study	Well-controlled Blood Glucose group：FBG＜11.1mmol/L;Poorly-controlled Blood Glucose: FBG≥11.1mmol/L.	11.1		12month，sputum conversion 2month	Well-controlled group: 64 cases (54 males, 10 females, ratio = 27:5), mean age 59.3±10.9 years.Poorly controlled group: 43 cases (33 males, 10 females, ratio = 33:10), mean age 60.1±11.6 years.
Wang K 2015	China	Prospective Cohort Study	Control group: oral hypoglycemic agents; Intervention group: subcutaneous insulin injection			9month	Intervention group and observation group: 35 cases each.
Wang M 2011	China	Retrospective cohort study	Well-controlled Blood Glucose group：FBG＜8.4mmol/L;Poorly-controlled Blood Glucose: FBG＞14mmol/L.Subjects with blood glucose levels between the two groups were defined as the moderate glycemic control group	8.4			Total: 120 cases (85 males, 35 females), mean age 56.2 years.
Wang W,2025	China	Prospective Cohort Study	Control group: oral hypoglycemic agents; Intervention group: intensive blood glucose control (subcutaneous insulin injection + lifestyle counseling), FBG: 4.4-6.1 mmol/L; 2h PBG＜7.8mmol/L				Control group: 18 males and 13 females, mean age 54.2±6.8 years. Observation group: 17 males and 14 females, mean age 55.6±7.3 years.
Wen 2015	China	Prospective Cohort Study	Observation group received early insulin intervention; the control group was initially treated with oral hypoglycemic agents, with insulin administered if glycemic control failed.			2month	Total 100 cases (67 males, 33 females), mean age 48.7±2.1 years.						rct
Wu 2011	China	Retrospective cohort study	Well-controlled Blood Glucose group：FBG＜7.0mmol/L;Poorly-controlled Blood Glucose: FBG＞10mmol/L.Subjects with blood glucose levels between the two groups were defined as the moderate glycemic control group	7		9month	Well-controlled group: 35 cases;Moderate controlled group: 33 cases;Poorly controlled group: 29 cases.
Wu 2019	China	Retrospective cohort study	Well-controlled Blood Glucose group:FBG≤6.1 mmol/L;Poorly-controlled Blood Glucose: FBG＞6.1mmol/L	6.1			Total 78 cases, including 46 males and 32 females, with a mean age of 62.13±0.67 years.
Wu 2021	China	Prospective Cohort Study	Well-controlled Blood Glucose group:FBG< 6.1 mmol/L and HbA1c <6% ;Poorly-controlled Blood Glucose: FBG＞6.1 mmol/L and HbA1c ＞6%	6.1		6month	A total of 102 patients were enrolled, including 58 males and 44 females, with a mean age of 60.52±4.85 years.
Xi 2014	China	Retrospective cohort study	All participants were divided into well-controlled, moderate controlled and poorly controlled groups based on glycemic levels, and the specific grouping criteria were not mentioned.				A total of 120 patients, including 69 males and 51 females, with a mean age of 47.4±10.5 years.
Xi 2017	China	Retrospective cohort study	Well-controlled Blood Glucose group:FBG≤8.0 mmol/L . Poorly-controlled Blood Glucose:FBG＞8.0 mmol/L	8		9month	A total of 83 patients.
Xiang 2015	China	Retrospective cohort study	Well-controlled Blood Glucose group: FBG < 8.3 mmol/L, HbA1c < 6.5%; Poorly-controlled Blood Glucose group：FBG ≥ 8.3 mmol/L，HbA1c ≥ 6.5%.	8.3	6.5		A total of 90 cases, including 52 males and 38 females, with a mean age of 50.1±7.3 years.
Xie 2015	China	Retrospective cohort study	FBG<6.1mmol/L,HbA1c≤6.5%,indicates good blood glucose control; FBG＞7 mmol/L,,HbA1c＞8%,indicates poor blood glucose control.Subjects with blood glucose levels between the two groups were defined as the moderate glycemic control group	6.1		9month	A total of 164 patients, including 97 males and 67 females, with a mean age of 46.83±10.29 years.
Xin 2018	China	Prospective Cohort Study	Control group: oral hypoglycemic agents maintained; Intervention group: subcutaneous insulin injection maintained FBG＜7			2month	In the control group, there were 27 males and 18 females, with a mean age of 51.87±10.57 years. In the study group, there were 28 males and 17 females, with a mean age of 52.10±10.42 years.
Xu 2025	China	Prospective Cohort Study	Control group: oral hypoglycemic agents; Intervention group: intensive blood glucose control (subcutaneous insulin injection + lifestyle counseling), FBG: 4.4-7.0 mmol/L; 2h PBG: 4.4-10.0 mmol/L			3month	In the control group, there were 24 males and 22 females, with a mean age of 48.49±4.31 years. In the intervention group, there were 25 males and 21 females, with a mean age of 47.74±4.24 years.
Yan 2019	China	Prospective Cohort Study	The control group received no standardized glycemic control intervention, while the intervention group was treated with oral hypoglycemic agents or insulin for blood glucose management.				Intervention group: 30 cases (19 males, 11 females), mean age 58.53±5.42 years; Control group: 30 cases (14 males, 16 females), mean age 57.32±6.23 years.
Yang 2015	China	Retrospective cohort study	Well-controlled Blood Glucose group：FBG≤8.4 mmol/L;Poorly-controlled Blood Glucose: FBG＞8.4 mmol/L	8.4		2,6,12month	A total of 78 patients were enrolled, including 48 males and 30 females, with a mean age of 56.2 years.
Yang 2018	China	Retrospective cohort study	The grouping criteria for the observation of pulmonary cavity closure and sputum bacteriological conversion were defined as follows:Well-controlled Blood Glucose group：FBG≤9.0 mmol/L;Poorly-controlled Blood Glucose: FBG＞9.0mmol/L;The grouping criteria for the observation of pulmonary lesion absorption were defined as follows:Well-controlled Blood Glucose group：FBG≤7.0mmol/L;Poorly-controlled Bloo…			9month, lesion absorption7	Well-controlled group: 42 cases (24 males, 18 females), mean age 49.84±10.62 years. Poorly controlled group: 54 cases (30 males, 24 females), mean age 50.12±11.03 years.
Yang 2019	China	Retrospective cohort study	Well-controlled Blood Glucose group:FBG＜7.0 mmol/L . Poorly-controlled Blood Glucose:FBG≥7.0 mmol/L	7		12month	Well-controlled glycemic group: 180 cases (98 males, 82 females), mean age 48.2±6.4 years.Poorly controlled glycemic group: 180 cases (97 males, 83 females), mean age 47.8±6.1 years.
Yang 2020	China	Retrospective cohort study	Well-controlled Blood Glucose group：FBG≤6.1 mmol/L;Poorly-controlled Blood Glucose: FBG≥6.1mmol/L	6.1			Well-controlled glycemic group: 34 males and 27 females, mean age 62.78±9.75 years. Poorly controlled glycemic group: 16 males and 13 females, mean age 64.14±8.10 years.
Yang N2018	China	Retrospective cohort study	Well-controlled Blood Glucose group： HbA1c ＜7% ;Poorly-controlled Blood Glucose: HbA1c ＜9.0% .moderate glycemic control group HbA1c＞10%		7	2month	Well-controlled glycemic group: 17 cases (9 males, 8 females), mean age 53.41±5.77 years;Fairly controlled glycemic group: 17 cases (8 males, 9 females), mean age 53.37±5.81 years;Moderately controlled glycemic group: 17 cases (7 males, 10 females), mean age 53.40±5.79 years.
Yang SJ 2018	China	Retrospective cohort study	Well-controlled Blood Glucose group:FBG≤8.4 mmol/L . Poorly-controlled Blood Glucose:FBG＞8.4 mmol/L	8.4		2,3,5,9 month	A total of 78 patients, including 48 males and 30 females, with a mean age of 42.5±4.5 years.
Yao 2024	China	Retrospective cohort study	Well-controlled Blood Glucose group： FBG＜6.1 mmol/L ,HbA1c ＜6.5% ;Poorly-controlled Blood Glucose: HbA1c ＞8% ，FBG＞7mmol/L ,Subjects with blood glucose levels between the two groups were defined as the moderate glycemic control group	6.1			A total of 130 cases, including 88 males and 42 females, with a mean age of 48.26±5.43 years.
Yu 2025	China	Prospective Cohort Study	Control group: oral hypoglycemic agents; Intervention group: intensive blood glucose control (subcutaneous insulin injection)			1month	Control group: 16 males and 14 females, mean age 65.03±4.28 years; Observation group: 18 males and 12 females, mean age 65.24±4.32 years.
Zeng 2019	China	Retrospective cohort study	Well-controlled Blood Glucose group：HbA1c≤8%;Poorly-controlled Blood Glucose: HbA1c＞8%		8	6month	A total of 51 cases, including 33 males and 18 females, with a mean age of 41.1±8.3 years.
Zhang 2016	China	Prospective Cohort Study	The treatment group received insulin glargine for glycemic control, while the control group was administered regular insulin.			2month,1month	Intervention group: 24 males and 6 females, mean age 49.18±10.08 years;Control group: 26 males and 4 females, mean age 51.74±9.58 years
Zhang 2018	China	Retrospective cohort study	HbA1c≤6.5% indicates good blood glucose control; 6.5% < HbA1c < 7% indicates moderate blood glucose control; HbA1c ≥ 7% indicates poor blood glucose control.		6.5	3month	Well-controlled glycemic group: 25 cases, mean age 42.69±6.31 years; Fairly controlled glycemic group: 30 cases, mean age 48.45±8.13 years; Moderately controlled glycemic group: 32 cases, mean age 47.12±10.18 years.
Zhang 2022	China	Retrospective cohort study	Well-controlled Blood Glucose group:FBG<≤7.0 mmol/L;Poorly-controlled Blood Glucose: FBG＞ 7.0 mmol/L	7	8		Well-controlled glycemic group: 39 cases (22 males, 17 females), mean age 58.15±4.01 years;Poorly controlled glycemic group: 21 cases (14 males, 7 females), mean age 58.94±4.46 years.
Zhang 2023	China	Retrospective cohort study	Well-controlled Blood Glucose group：HbA1c <6.5% ;Poorly-controlled Blood Glucose: HbA1c ＞6.5%		6.5	3month	Poorly controlled glycemic group: 25 cases; Well-controlled glycemic group: 48 cases.
Zhao 2013	China	Retrospective cohort study	Well-controlled Blood Glucose group：FBG≤7 mmol/L;Poorly-controlled Blood Glucose: FBG＞7mmol/L	7			Poorly controlled glycemic group: 58 cases (39 males, 19 females), mean age 43.5±9.5 years.Well-controlled glycemic group: 158 cases (101 males, 57 females), mean age 44.9±10.7 years.
Zheng 2016	China	Prospective Cohort Study	The control group received subcutaneous insulin for glycemic control, while the observation group was treated with insulin pump therapy for blood glucose management.			5month,2month	Control group: 33 males and 10 females, mean age 58.36±3.24 years; Intervention group: 29 males and 14 females, mean age 55.14±4.21 years.
Zhou 2013	China	Retrospective cohort study	FBG<7mmol/L,indicates good blood glucose control; FBG＞10 mmol/L ndicates poor blood glucose control.Subjects with blood glucose levels between the two groups were defined as the moderate glycemic control group	7			A total of 50 cases, 28 males and 22 females, aged 24–75 years with a mean age of 38.21±8.3 years.
Zhou 2017	China	Retrospective cohort study	Well-controlled Blood Glucose group：FBG< 6.1 mmol/L,HbA1c <6.5% ;Poorly-controlled Blood Glucose: FBG＞7mmol/L,HbA1c ＞8.0%	7			A total of 82 cases, 49 males and 33 females, with a mean age of 47.15±9.12 years.
Zhou 2025	China	Retrospective cohort study	Well-controlled Blood Glucose group:FBG＜6.9 mmol/L . Poorly-controlled Blood Glucose:FBG≥7.0 mmol/L	7			Well-controlled glycemic group with a male-to-female ratio of 18:12, mean age 51.24±2.18 years;Poorly controlled glycemic group with a male-to-female ratio of 16:14, mean age 51.26±2.17 years.
Zhu 2020	China	Retrospective cohort study	Well-controlled Blood Glucose group:FBG＜7.0 mmol/L . Poorly-controlled Blood Glucose:FBG≥7.0 mmol/L	7		2,4month	Well-controlled glycemic group: 30 males and 22 females, mean age 56.25±8.42 years;Poorly controlled glycemic group: 28 males and 24 females, mean age 56.05±8.35 years.
Zhu 2025	China	Prospective Cohort Study	Control group: oral hypoglycemic agents; Intervention group: intensive blood glucose control (subcutaneous insulin injection + lifestyle counseling)				Control group: 36 patients (24 males, 12 females), mean age 46.27±3.68 years.Intervention group: 24 males and 12 females, mean age 54.78±3.8 years.
Zou 2021	China	Prospective Cohort Study	Control group: oral hypoglycemic agents; Intervention group: intensive blood glucose control (subcutaneous insulin injection).both FBG≤7mmol/L	7			Control group: 23 males and 17 females, mean age 56.52±5.12 years. Intervention group: 25 males and 15 females, mean age 57.21±5.21 years.
