# Supplementary material
Source: Research Square preprint supplement (doi:10.21203/rs.3.rs-10020701/v1)
Supplement: Supplementary file 5 [file f0330fdab4c6e2ff53fc7249.xlsx]

## Sheet: Sheet1
outcome	n_studies_original	n_filled	n_studies_total	or_original	ci_low_original	ci_high_original	or_trimmed	ci_low_trimmed	ci_high_trimmed	egger_p	I2	change_percent	robustness
overall response rate	36	0	36	0.171	0.132	0.222	0.171	0.132	0.222	0	26.5	0	Good
sputum conversion	58	16	74	0.205	0.172	0.244	0.264	0.216	0.323	0	17.3	28.75	Poor
pulmonary lesion absorption	49	16	65	0.183	0.152	0.222	0.238	0.19	0.298	0	7.01	29.64	Poor
cavity closure	33	13	46	0.252	0.204	0.311	0.314	0.25	0.395	0	0	24.85	Poor
